# Supplementary material for: Photo- and thermally-enhanced charge separation in supramolecular viologen–hexacyanoferrate complexes
Source: Royal Society of Chemistry journal article supplement (doi:10.1039/b915642a), 2009-09-08
Supplement: b915642a.pdf [file b915642a.pdf]

## **Photo- and Thermally-Enhanced Charge Separation in Supramolecular Viologen-Hexacyanoferrate Complexes**

Ahmed Abouelwafa, Valeriu Mereacre, Yanhua Lan, Teodor Silviu Balaban, Christopher E. Anson and Annie K. Powell\*

### **Supporting Information**

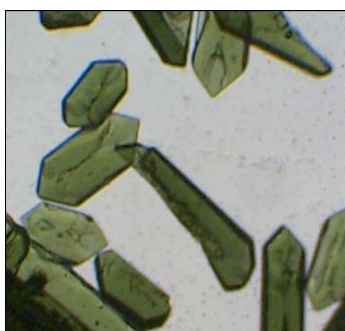

**Fig. S1** Crystals of the viologen/hexacyanoferrate complex under visible-light microscope

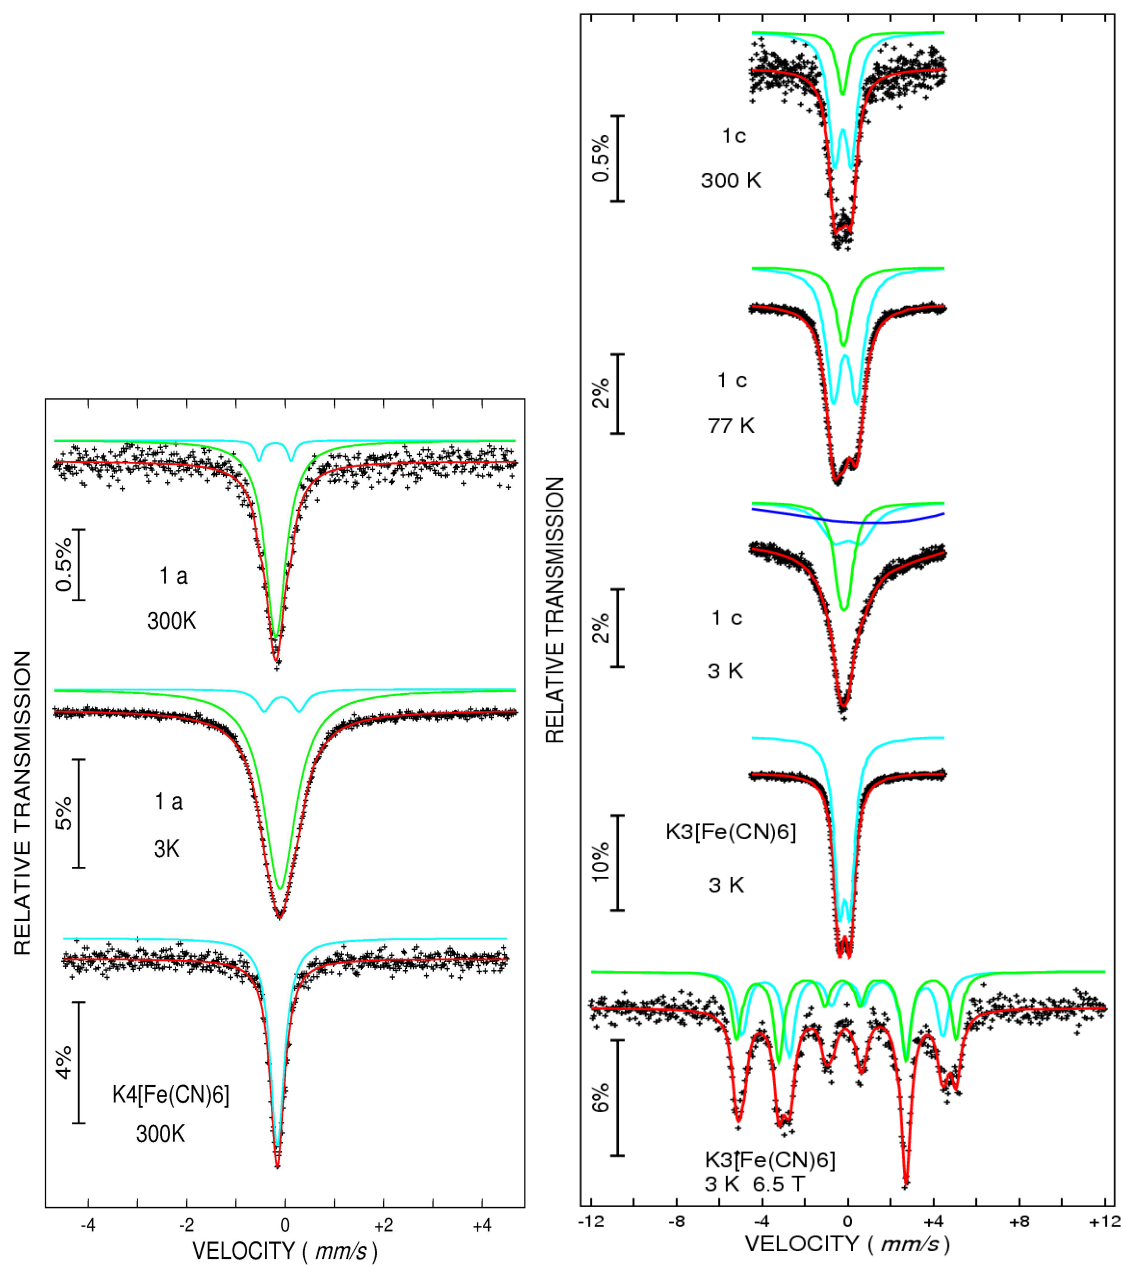

**Fig. S2** Mössbauer spectra of (**1a**) at 300 and 3 K (left), and (**1c**) at 300, 77 and 3 K (right). Mössbauer spectra for  $K_4[Fe^{II}(CN)_6]$  and  $K_3[Fe^{III}(CN)_6]$  are shown for comparison.

**Table S1.** Mössbauer data for (1a).

| T, K     | Type of Fe | $\delta^{[a]}$ , mm/s | $\Delta E_Q$ or $\varepsilon$ ,<br>mm/s | $\Gamma$ , mm/s | $B_{\text{eff}}$ , T |
|----------|------------|-----------------------|-----------------------------------------|-----------------|----------------------|
| 300      | Fe(II)     | -0.008(3)             | 0                                       | 0.52(1)         | -                    |
|          | Fe(III)    | -0.097(8)             | 0.66(3)                                 | 0.25(1)         | -                    |
| 3        | Fe(II)     | 0.006(1)              | 0                                       | 0.80(3)         | -                    |
|          | Fe(III)    | -0.036(5)             | 0.72(1)                                 | 0.25(1)         | -                    |
| 3K, 6.5T | Fe(II)     | 0.009(1)              | 0.004(8) <sup>[b]</sup>                 | 0.33(1)         | 6.76                 |
|          | Fe(III)    | -0.069(8)             | 0.46(1) <sup>[b]</sup>                  | 0.27(4)         | 30.90                |

[a] Relative to  $\alpha$ -Fe at room temperature.[b] For magnetically-split spectra  $\varepsilon = \frac{1}{2}\Delta E_Q(3\cos^2\theta-1)$  (quadrupole shift).**Table S2.** Mössbauer data for (1c).

| T, K     | Type of Fe | $\delta^{[a]}$ , mm/s | $\Delta E_Q$ or $\varepsilon$ ,<br>mm/s | $\Gamma$ , mm/s | $B_{\text{eff}}$ , T | Area, % |
|----------|------------|-----------------------|-----------------------------------------|-----------------|----------------------|---------|
| 300      | Fe(II)     | -0.096(8)             | 0                                       | 0.67(6)         | -                    | 20.0    |
|          | Fe(III)    | -0.116(7)             | 0.78(2)                                 | 0.66(2)         | -                    | 80.0    |
| 77       | Fe(II)     | -0.067(1)             | 0                                       | 0.82(1)         | -                    | 24.86   |
|          | Fe(III)    | -0.085(2)             | 1.02(3)                                 | 0.80(1)         | -                    | 75.14   |
| 3        | Fe(II)     | -0.041(8)             | 0                                       | 0.75(4)         | -                    | 28.4    |
|          | Fe(III)    | -0.061(4)             | 1.12(4)                                 | 0.75(4)         | -                    | 71.6    |
| 3K, 6.5T | Fe(II)     | 0.006(9)              | 0.004(7) <sup>[b]</sup>                 | 0.45(1)         | 6.75                 | 28.4    |
|          | Fe(III)    | -0.097(6)             | 0.031(8) <sup>[b]</sup>                 | 0.83(7)         | 30.52                | 71.6    |

[a] Relative to  $\alpha$ -Fe at room temperature.[b] For magnetically-split spectra  $\varepsilon = \frac{1}{2}\Delta E_Q(3\cos^2\theta-1)$  (quadrupole shift).

**Table S3.** Microanalyses of the fresh and heated samples at 80 °C, 95 °C and 150 °C.

| Condition                        | Formula unit                               | Calculated                      | Found                           |
|----------------------------------|--------------------------------------------|---------------------------------|---------------------------------|
| Fresh sample<br>(dried in vacum) | $C_{50}H_{28}FeN_{18}O_{16} \cdot 7.5H_2O$ | C, 45.23<br>H, 3.26<br>N, 18.99 | C, 45.18<br>H, 3.01<br>N, 18.24 |
| Heated at 80 °C                  | $C_{50}H_{28}FeN_{18}O_{16} \cdot 1H_2O$   | C, 49.60<br>H, 2.50<br>N, 20.82 | C, 49.53<br>H, 2.48<br>N, 20.71 |
| Heated at 95 °C                  | $C_{50}H_{28}FeN_{18}O_{16} \cdot 0.5H_2O$ | C, 49.97<br>H, 2.43<br>N, 20.98 | C, 49.93<br>H, 2.22<br>N, 20.51 |

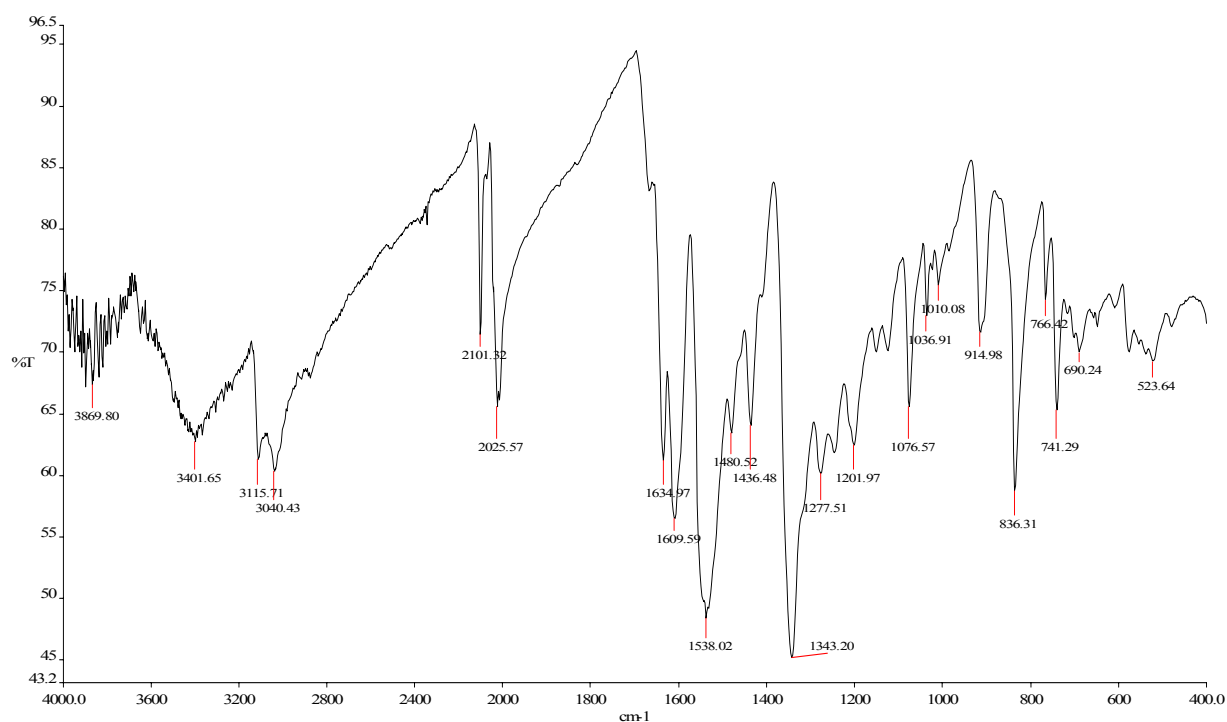

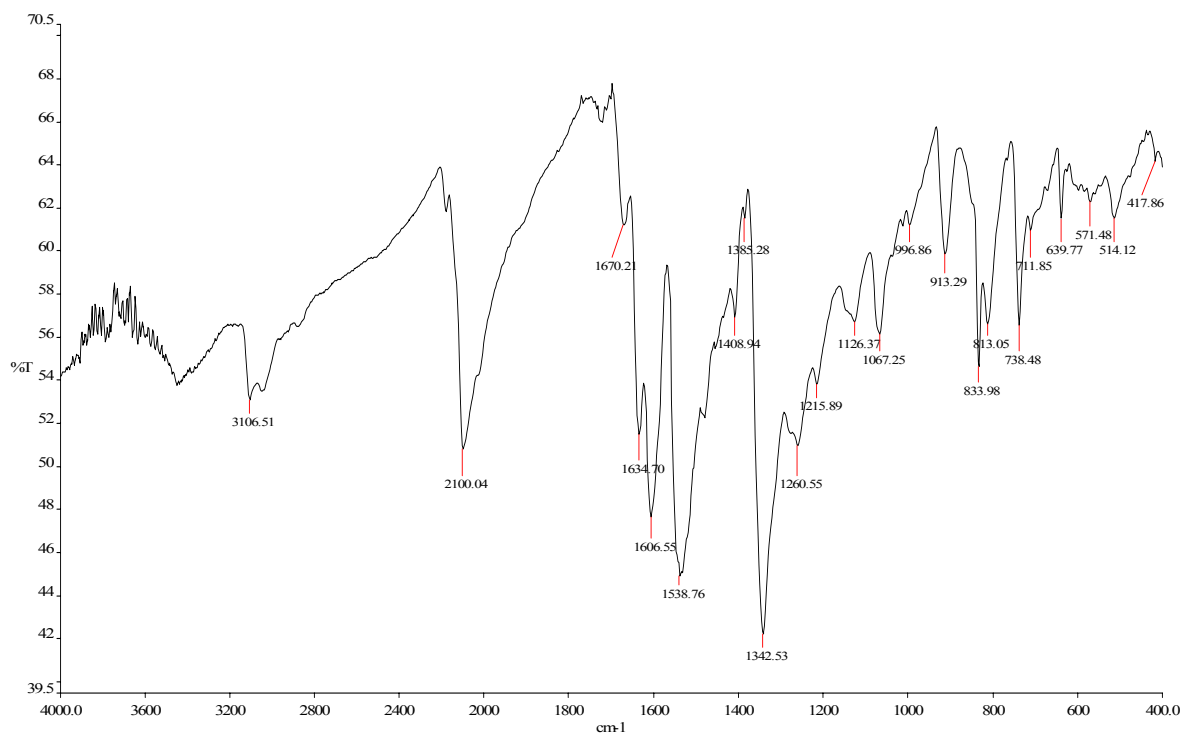

**Fig. S3** IR spectra of the complexes (**1a**), top; and (**1c**), bottom in the range 400 - 4000  $\text{cm}^{-1}$ .

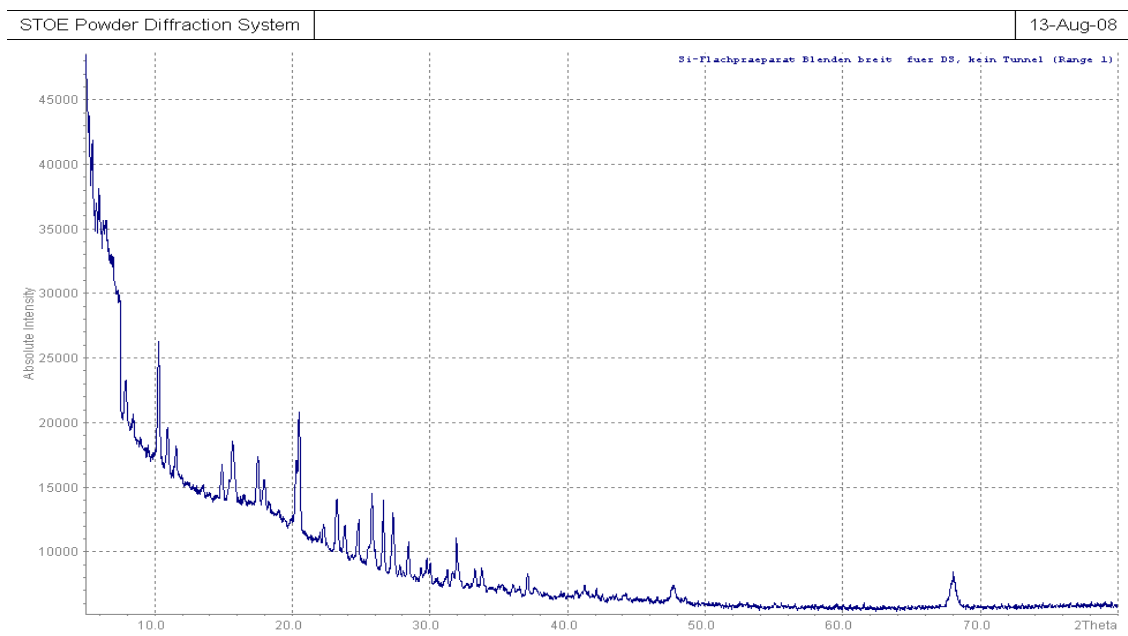

**Fig. S4** X-ray powder pattern for sample (**1a**).

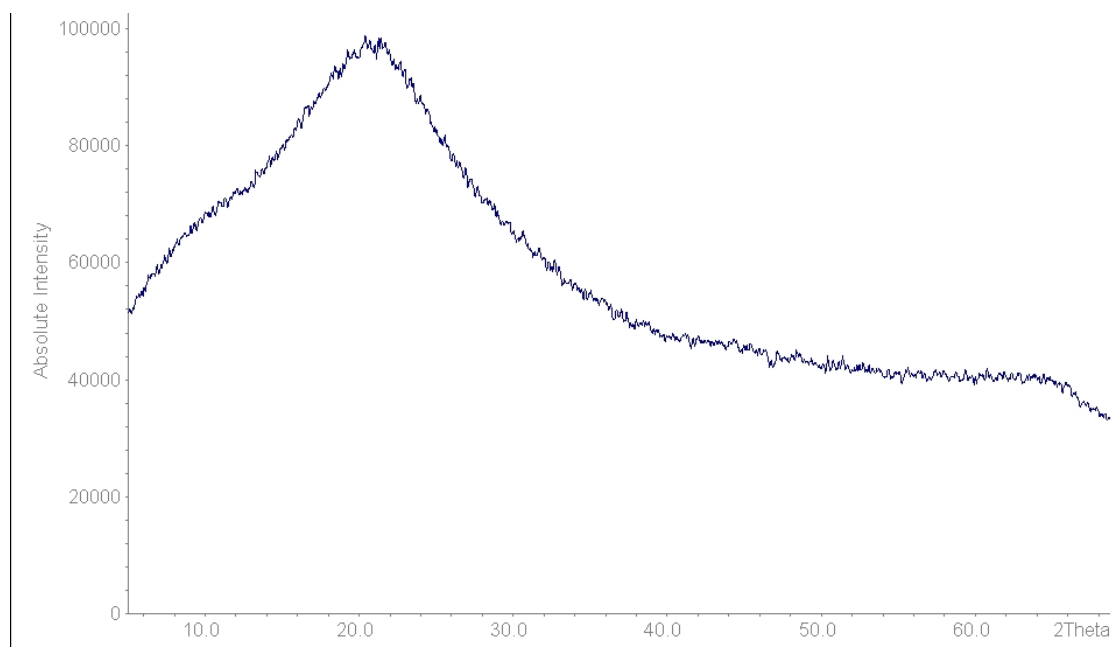

**Fig. S5** X-ray powder pattern for sample (**1c**).
